# Supplementary material for: Ultraviolet exposure of mice fed a high fat diet reduces weight gain and markers of liver disease progression
Source: Research Square preprint supplement (doi:10.21203/rs.3.rs-5417248/v1), 2024-11-25
Supplement: Supplementary file 1 [file 1c6c331d04f1b86507c63a30.xlsx]

## Sheet: Nutrition information
Ingredient	Inclusion (%) Low fat diet	Inclusion (%) High fat diet
Calcium carbonate	2.52	2.52
Casein	20	20
Cellulose	5	5
Choline chloride (50%)	0.38	0.38
Dicalcium Phosphate	5.1	5.1
Lard	0	20.7
Magnesium oxide	0.17	0.17
Maize starch	35.87	17.27
Maltodextrin	13.2	13.2
Methionine	0.3	0.3
Mineral mix	0.14	0.14
Potassium citrate	0.15	0.15
Potassium dihydrogen phosphate	0.76	0.76
Potassium sulphate	0.16	0.16
Salt	0.26	0.26
Soya oil	5	2.9
Sucrose	10	10
Vitamin mix - no added vitamin D	1	1
