# Supplementary material for: Ultraviolet exposure of mice fed a high fat diet reduces weight gain and markers of liver disease progression
Source: Research Square preprint supplement (doi:10.21203/rs.3.rs-5417248/v1), 2024-11-25
Supplement: Supplementary file 2 [file c9715ec93731c22341f28fbd.xlsx]

## Sheet: Cytokine array females
Number	Cytokine	Fold change (females)	P value (females	F Test (females)	Significant
1	4-1BB	0.5	0.007	0.76	Yes
2	AXL	1	0.904	0.3
3	CD30 L	1	0.816	0.32
4	CD36	1	0.989	0.16
5	CD40 ligand	1.3	0.161	0.15
6	Chordin	1.1	0.777	0.27
7	CRG-2	1	0.714	0.49
8	CTACK	0.9	0.299	0.14
9	CXCCL1	1	0.795	0.56
10	EOTAXIN -1	0.8	0.393	0.74
11	EOTAXIN-2	1.1	0.591	0.66
12	FC GAMMA RIB	1.7	0.006	0.71	Yes
13	FN14	1.2	0.591	0.75
14	Galectin-1	1.1	0.712	0.5
15	GAS1	1.1	0.531	0.24
16	GAS6	1	0.798	0.97
17	GM-CSF - blot 2	1.1	0.357	0.28
18	Granzyme B	1.3	0.2	0.31
19	GSCF - blot 2	0.9	0.725	0.43
20	ICAM-1	0.8	0.146	0.25
21	IFN-GAMMA	1.1	0.316	0.49
22	IGF-1	1.2	0.313	0.65
23	IGFBP2	1.2	0.521	0.46
24	IL-1 alpha	1	0.524	0.85
25	IL-1 beta	1	0.977	0.02
26	IL-10	1	0.997	0.38
27	IL-11	0.6	0.025	0.93	Yes
28	IL-17B	0.7	0.026	0.27	Yes
29	IL-17E	1	0.119	0.8
30	IL-17F	1	0.094	0.36
31	IL-21	1.2	0.54	0.46
32	IL-28	1.1	0.801	0.11
33	il-2r alPHA	0.8	0.309	0.97
34	IL-6	1	0.762	0.69
35	IL-6R	1	0.857	0.79
38	IL-9	1	0.708	0.71
39	ITAC	1.3	0.054	0.51
40	JAM-A	1.5	0.12	0.03
41	KC - blot 2	0.9	0.203	0.67
42	MCP-1	1	0.939	0.09
43	MCP5 - blot 2	1.2	0.417	0.88
44	MMP-2	1.6	0.005	0.91	Yes
45	OPN	1.3	0.201	0.88
46	PRL	0.9	0.51	0.07
47	P-SELECTIN	1.1	0.508	0.51
48	PTX3	0.9	0.351	0.45
49	RANTES	1.1	0.552	0.9
50	TIMP-2	1.3	0.066	0.21
51	TNF-ALPHA	1.1	0.674	0.38
52	TRANCE	1.2	0.039	0.78	Yes
53	TREM 1	1.3	0.261	0.12
54	TROY	1.4	0.023	0.44
55	TWEAK	1.5	0.195	0.05
56	VCAM1	1.2	0.381	0.59
57	VEGF R1	1.2	0.349	0.66
