# Supplementary material for: Ultraviolet exposure of mice fed a high fat diet reduces weight gain and markers of liver disease progression
Source: Research Square preprint supplement (doi:10.21203/rs.3.rs-5417248/v1), 2024-11-25
Supplement: Supplementary file 3 [file e8fcd556cfb931e3ab518692.xlsx]

## Sheet: Cytokine array males
Number	Cytokine	Fold change (males)	P-value (males)	F-test (males)	Significant
1	4-1BB	1	0.959	0.77
2	AXL	1.1	0.877	0.38
3	CD30 L	0.8	0.131	0.62
4	CD36	0.5	0.021	0.22	Yes
5	CD40 ligand	0.7	0.06	0.72
6	Chordin	0.7	0.296	0.03
7	CRG-2	1.1	0.73	0.16
8	CTACK	1.4	0.597	0.2
9	CXCCL1	0.7	0.275	0.1
10	EOTAXIN -1	1.4	0.526	0.27
11	EOTAXIN-2	1.5	0.664	0.02
12	FC GAMMA RIB	0.6	0.181	0.84
13	FN14	0.7	0.693	0.31
14	Galectin-1	0.7	0.263	0.22
15	GAS1	0.8	0.253	0.83
16	GAS6	0.8	0.19	0.74
17	GM-CSF - blot 2	1.1	0.406	0.35
18	Granzyme B	0.6	0.287	0.3
19	GSCF - blot 2	1	0.852	0.76
20	ICAM-1	0.9	0.354	0.78
21	IFN-GAMMA	1	0.987	0.27
22	IGF-1	0.5	0.053	0.19
23	IGFBP2	0.6	0.067	0.07
24	IL-1 alpha	0.8	0.301	0.28
25	IL-1 beta	0.8	0.515	0.2
26	IL-10	1.2	0.609	0.06
27	IL-11	1.1	0.784	0.03
28	IL-17B	1	0.905	0.19
29	IL-17E	1.3	0.237	0.47
30	IL-17F	1.1	0.734	0.44
31	IL-21	0.9	0.435	0.36
32	IL-28	0.9	0.399	0.25
33	il-2r alPHA	0.8	0.354	0.23
34	IL-6	1.4	0.285	0.76
35	IL-6R	0.8	0.121	0.37
38	IL-9	1.4	0.113	0.2
39	ITAC	0.7	0.194	0.67
40	JAM-A	0.8	0.095	0.85
41	KC - blot 2	1.1	0.62	0.25
42	MCP-1	0.9	0.667	0.84
43	MCP5 - blot 2	1	0.966	0.6
44	MMP-2	0.5	0.129	0.42
45	OPN	0.8	0.629	0.9
46	PRL	1	0.772	0.2
47	P-SELECTIN	1.1	0.732	0.03
48	PTX3	1.2	0.485	0.2
49	RANTES	1.3	0.699	0.03
50	TIMP-2	0.6	0.372	0.8
51	TNF-ALPHA	1.1	0.761	0.45
52	TRANCE	0.5	0.392	1
53	TREM 1	1.1	0.347	0.41
54	TROY	0	0.974	0.93
55	TWEAK	0.9	0.986	0.75
56	VCAM1	1.2	0.634	0.23
57	VEGF R1	0.8	0.312	0.4
